# Supplementary material for: Validation Study to Determine the Accuracy of Widespread Promoterless EGFP Reporter at Assessing CRISPR/Cas9-Mediated Homology Directed Repair
Source: MDPI journal article supplement (doi:10.3390/cimb44040116), 2022-04-12
Supplement: s1 [file s1]

# Supplementary Materials

## Supplementary Figures

A

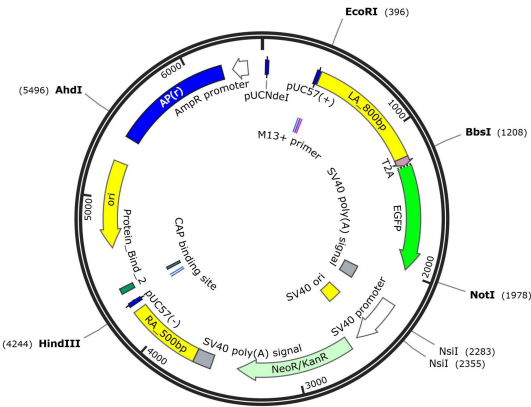

B

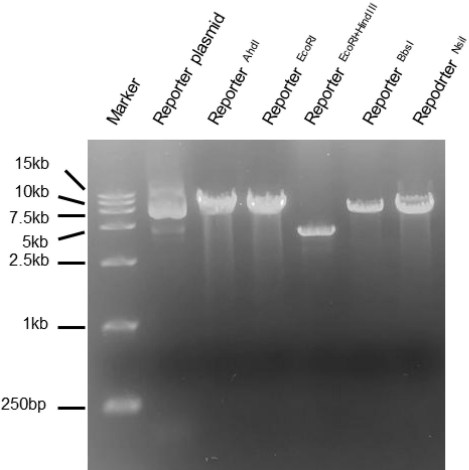

C

| Guide sequence + PAM               | Specificity | Predicted Efficiency | Off-targets for 0 - 1 - 2 - 3 - 4 mismatches + Next to PAM <sup>a</sup> |
|------------------------------------|-------------|----------------------|-------------------------------------------------------------------------|
| CCTCCTCGCGTGCTCTTGCT<br><b>GGG</b> | 91          | 35                   | 0-0-1-7-84; 0-0-1-1-1                                                   |
| GTGTGTTGGGGGATCGAGTT<br><b>GGG</b> | 96          | 30                   | 0-0-2-18-183; 0-0-0-0-1                                                 |
| CATGGTCCACATGGCCTCCA<br><b>AGG</b> | 77          | 54                   | 0-0-6-33-196; 0-0-1-4-9                                                 |

<sup>a</sup> For each number of mismatches, the number of off-targets is indicated. Off-targets are considered if they are flanked by one of these motifs: NGG, NAG, NGA. Shown in red are the off-targets that have no mismatches in the 12 bp adjacent to the PAM. These are the most likely off-targets.

D

sgRNA1: CCTCCTCGCGTGCTCTTGCT

sgRNA2: GTGTGTTGGGGGATCGAGTT

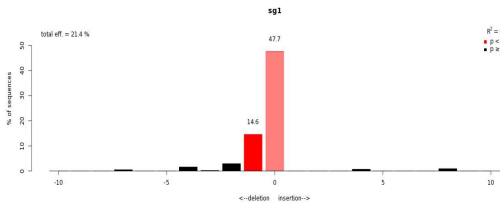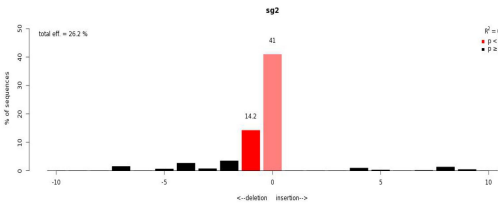

**Figure S1.** Analysis the constructed reporter plasmid and editing efficiency of the designed sgRNA. (A) Map of the constructed promoterless EGFP reporter. (B) Gel electropherogram of reporter plasmid and corresponding linearized fragments. (C) Three sgRNAs targeting porcine GAPDH locus were designed and their efficiencies and off-targets potency were predicted by CRISPOR in advance. (D) Validation intracellular indels efficiencies and indels patterns of sgRNA1 and sgRNA2 targeting exon 12 of porcine GAPDH by TIDE analysis. Cells were transfected with CRISPR/Cas9 system and harvested after 48 hours for Sanger sequence of GAPDH locus.

sgRNA1

[illegible]

sgRNA2

| Probability | Sequence                                                       | Wild type |
|-------------|----------------------------------------------------------------|-----------|
| 19.12%      | CAGGAGATCGTGTGTTGTGGGGATGCA   GTGGGGGTGTGATCTCCCGCACTGAGG      | 11-1      |
| 5.63%       | CAGGAGATCGTGTGTTGTGGGGATGCA   GTGGGGGTGTGATCTCCCGCACTGAGG      | 12-1      |
| 4.20%       | CAGGAGATCGTGTGTTGTGGGG-----   -----GTGATCTCCCGCACTGAGG         | 11-2      |
| 9.06%       | CAGGAGATCGTGTGTTGTGGGG-----   -----GTGATCTCCCGCACTGAGG         | 11-5      |
| 3.76%       | CAGGAGATCGTGTGTTGTGGGGATGCA X GTGGGGGTGTGATCTCCCGCACTGAGG      | 11-3      |
| 2.72%       | CAGGAGATCGTGTGTTGTGGGGAT-   -----GTGATCTCCCGCACTGAGG           | 12-3      |
| 2.48%       | CAGGAGATCGTGTGTTGTGGGGATGCA   -----CTCCCGCACTGAGG              | 11-0      |
| 1.50%       | CAGGAGATCGTGTGT   -----GTGGGGGTGTGATCTCCCGCACTGAGG             | D13-0     |
| 1.39%       | CAGGAGATCGTGTGTTGTGGGG-----   -----GTGATCTCCCGCACTGAGG         | D10-0     |
| 3.37%       | CAGGAGATCGTGTGTTGTGGGGATGCA   GTGGGGGTGTGATCTCCCGCACTGAGG      | D2-5      |
| 1.31%       | CAGGAGATCGTGTGTTGTGGGG-----   -----GTGGGGGTGTGATCTCCCGCACTGAGG | D6-5      |
| 1.21%       | CAGGAGATCGTGTGTTGTGGGGATGCA   GTGGGGGTGTGATCTCCCGCACTGAGG      | D1-0      |
| 1.17%       | CAGGAGATCGTGTGTTGTGGGGATGCA   GTGGGGGTGTGATCTCCCGCACTGAGG      | D1-2      |
| 1.06%       | CAGGAGATCGTGTGTGTG   GTGGGGGTGTGATCTCCCGCACTGAGG               | D10-9     |
| 1.03%       | CAGGAGATCGTGTGTTGTGGGG-----   -----GTGATCTCCCGCACTGAGG         | D13-5     |
| 1.00%       | CAGGAGATCGTGTGTTGTGGGG-----   -----GTGATCTCCCGCACTGAGG         | D17-5     |
| 0.87%       | CAGGAGATCGTGTGTTGTGG-----   GTGGGGGTGTGATCTCCCGCACTGAGG        | D9-8      |
| 0.82%       | CAGGAGATCGTGTGTTGTGGGGATGCA Y GTGGGGGTGTGATCTCCCGCACTGAGG      | D1-8      |
| 0.81%       | CAGGAGATCGTGTGTTGTGGGG-----   GTGGGGGTGTGATCTCCCGCACTGAGG      | D17-15    |

sgRNA3

| Probability | Sequence                          | Effect                              |
|-------------|-----------------------------------|-------------------------------------|
|             | 0.007 GGTGTGGAGCACTGGTTCACATGGCTT | CGAGAGGTAGAGCTGGAGTGCACAC wild-type |
| 30.41%      | 0.007 GGTGTGGAGCACTGGTTCACATGGCTT | T CGAGAGGTAGAGCTGGAGTGCACAC ThT     |
| 9.11%       | 0.007 GGTGTGGAGCACTGGTTCACATGGCTT | -----AAGAGTAGAGCTGGAGTGCACAC D3-1   |
| 4.01%       | 0.007 GGTGTGGAGCACTGGTTCACATGGT-  | -----AGTAAAGCTGGAGTGCACAC D3-2      |
| 3.59%       | 0.007 GGTGTGGAGCACTGGTTCACATGGCT  | -----CTGGAGTGCACAC D18-1            |
| 3.52%       | 0.007 GGTGTGGAGCACTGGTTCACATGGCTT | CGAGAGGTAGAGCTGGAGTGCACAC D18-2     |
| 3.47%       | 0.007 GGTGTGGAGCACTGGTTCACATGGCT  | -----AAGAGTAGAGCTGGAGTGCACAC D10-8  |
| 3.27%       | 0.007 GGTGTGGAGCACTGGTTCACATGGCTT | X CGAGAGGTAGAGCTGGAGTGCACAC D3-X    |
| 3.25%       | 0.007 GGTGTGGAGCACTGGTTCACATGGCTT | -----AAGAGTAGAGCTGGAGTGCACAC D2-0   |
| 3.19%       | 0.007 GGTGTGGAGCACTGGTTCACATGGCTT | T CGAGAGGTAGAGCTGGAGTGCACAC D2-1    |
| 3.06%       | 0.007 GGTGTGGAGCACTGGTTCACATGGCTT | -----AAGAGCTGGAGTGCACAC D9-0        |
| 1.91%       | 0.007 GGTGTGGAGCACTGGTTCACATGGCT  | -----AAGAGCTAGAGCTGGAGTGCACAC D9-6  |
| 1.05%       | 0.007 GGTGTGGAGCACTGGTTCACATGGCTT | SGAGTAGAGCTGGAGTGCACAC D4-0         |
| 1.00%       | 0.007 GGTGTGGAGCACTGGTTCACATGGCTT | T CGAGAGGTAGAGCTGGAGTGCACAC D1-1    |
| 0.97%       | 0.007 GGTGTGGAGCACTGGTTCACATGGCTT | -----CTGGAGTGCACAC D17-1            |
| 0.81%       | 0.007 GGTGTGGAGCACTGGTTCAC-----   | T CGAGAGGTAGAGCTGGAGTGCACAC D18-5   |
| 0.82%       | 0.007 GGTGTGGAGCACTGGTTCAC-----   | -----AAGAGTAGAGCTGGAGTGCACAC D8-7   |
| 0.78%       | 0.007 GGTGTGGAGCACTGGTTCACATGGCT  | T-----AAGAGTAGAGCTGGAGTGCACAC D4-2  |
| 0.73%       | 0.007 GGTGTGGAGCACTGGTTCACATGGCTT | -----AAGAGTAGAGCTGGAGTGCACAC D3-0   |
| 0.74%       | 0.007 GGTGTGGAGCACTGGTTCAC-----   | T CGAGAGGTAGAGCTGGAGTGCACAC D10-9   |
| 0.61%       | 0.007 GGTGTGGAGCACTGGTTCACATGGCTT | -----GTAGAGCTGGAGTGCACAC D9-9       |

**B**

sgRNA1

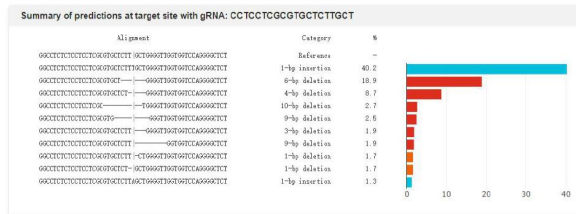

sgRNA2

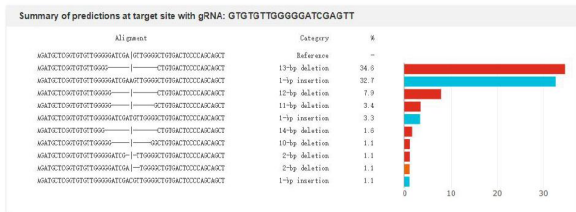

sgRNA3

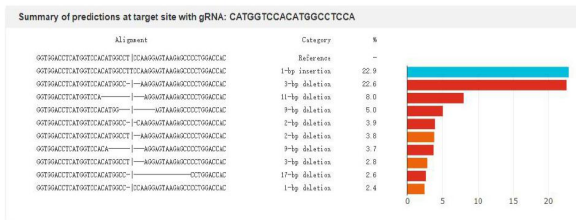

C

sgRNA1

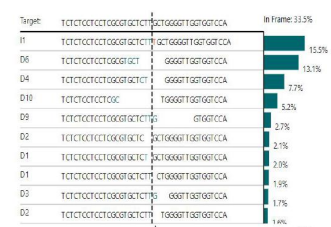

sgRNA2

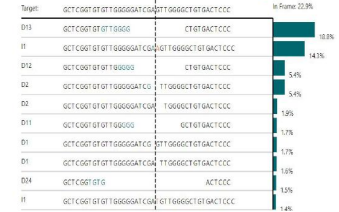

sgRNA3

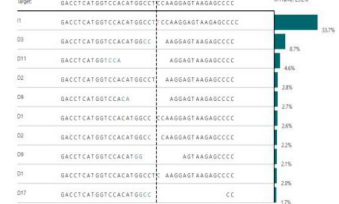

**Figure S2.** Prediction of indels signatures for the three designed sgRNAs. (A) Lindel; (B) inDelphi; (C) ForeCast.

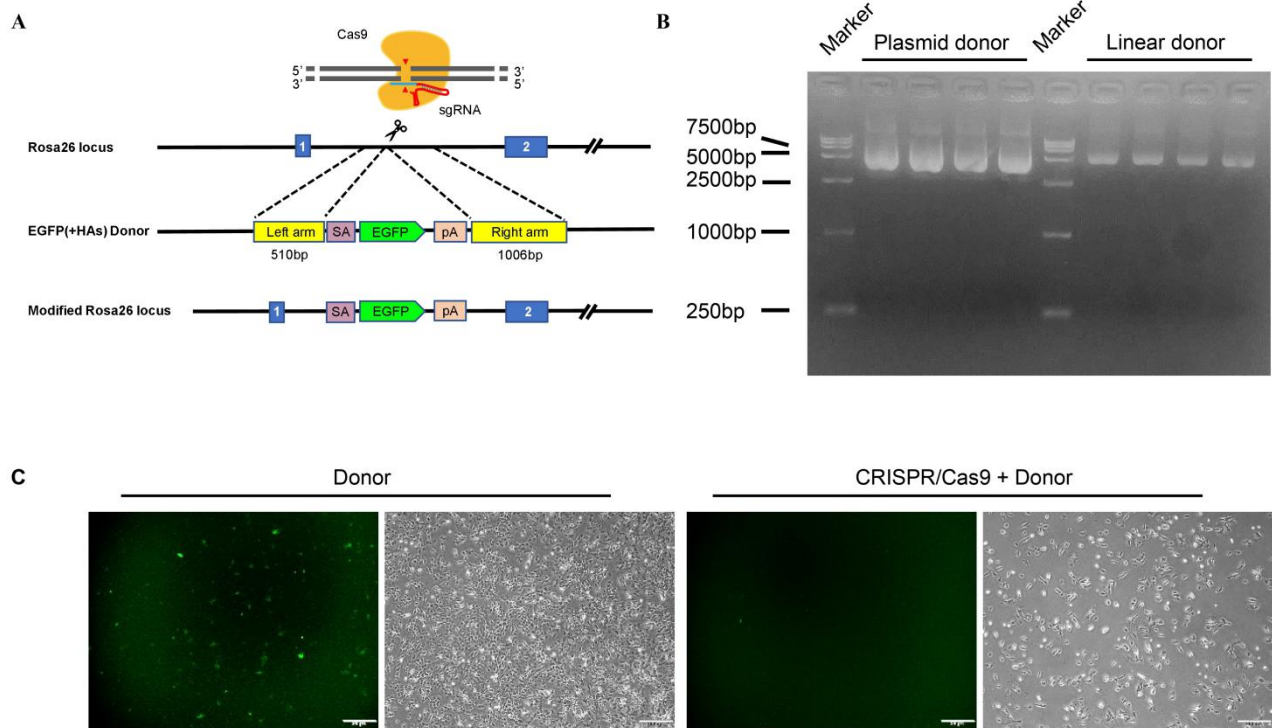

**Figure S3.** Overview of promoterless EGFP reporter targeting the ROSA26 locus. (A) Schematic of ROSA26 targeted HDR reporter strategy. Donor vector was designed containing a 510-bp left homologous arm and a 1006-bp right homologous arm. SA, splice acceptor; PA, polyA; (B) Gel electropherogram for intact reporter and linearized fragments. (C) Fluorescence microscope of PFF cells 48 hours post transfection of CRISPR/cas9 and HDR reporter donor or reporter donor only. EGFP positive cells can be observed in both groups. Scale bar: 200  $\mu$ m.

A

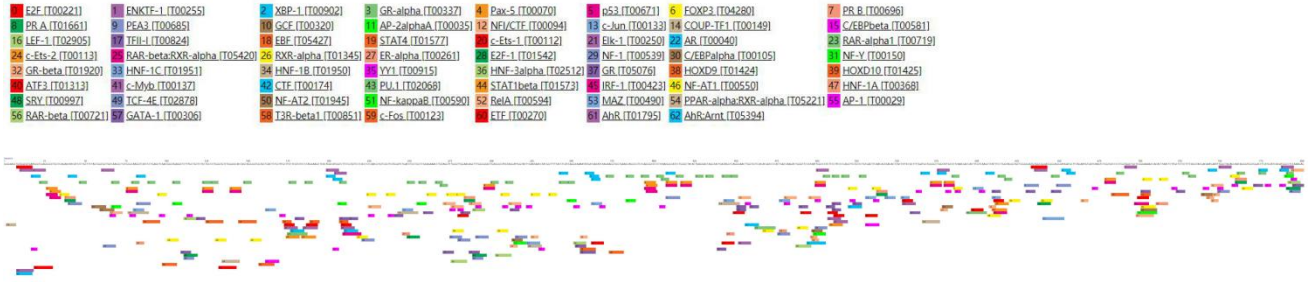

B

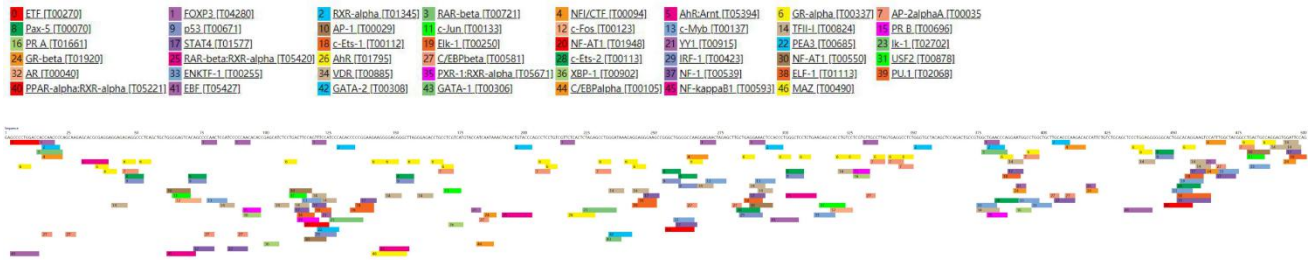

**Figure S4.** Prediction of the transcription factor binding site, promoter and initiation codons. **(A)** Human transcription factors and its corresponding binding sites in the porcine left homologous arms were predicted by PROMO. Factors predicted within a dissimilarity margin less or equal than 15%. **(B)** Human transcription factors and its corresponding binding sites in porcine right homologous arms were predicted by PROMO. Factors predicted within a dissimilarity margin less or equal than 15%. Interesting transcription factor binding sites of *Sus scrofa* and *Hamster* were not predicted but could still exist due to few data referring to them at present.



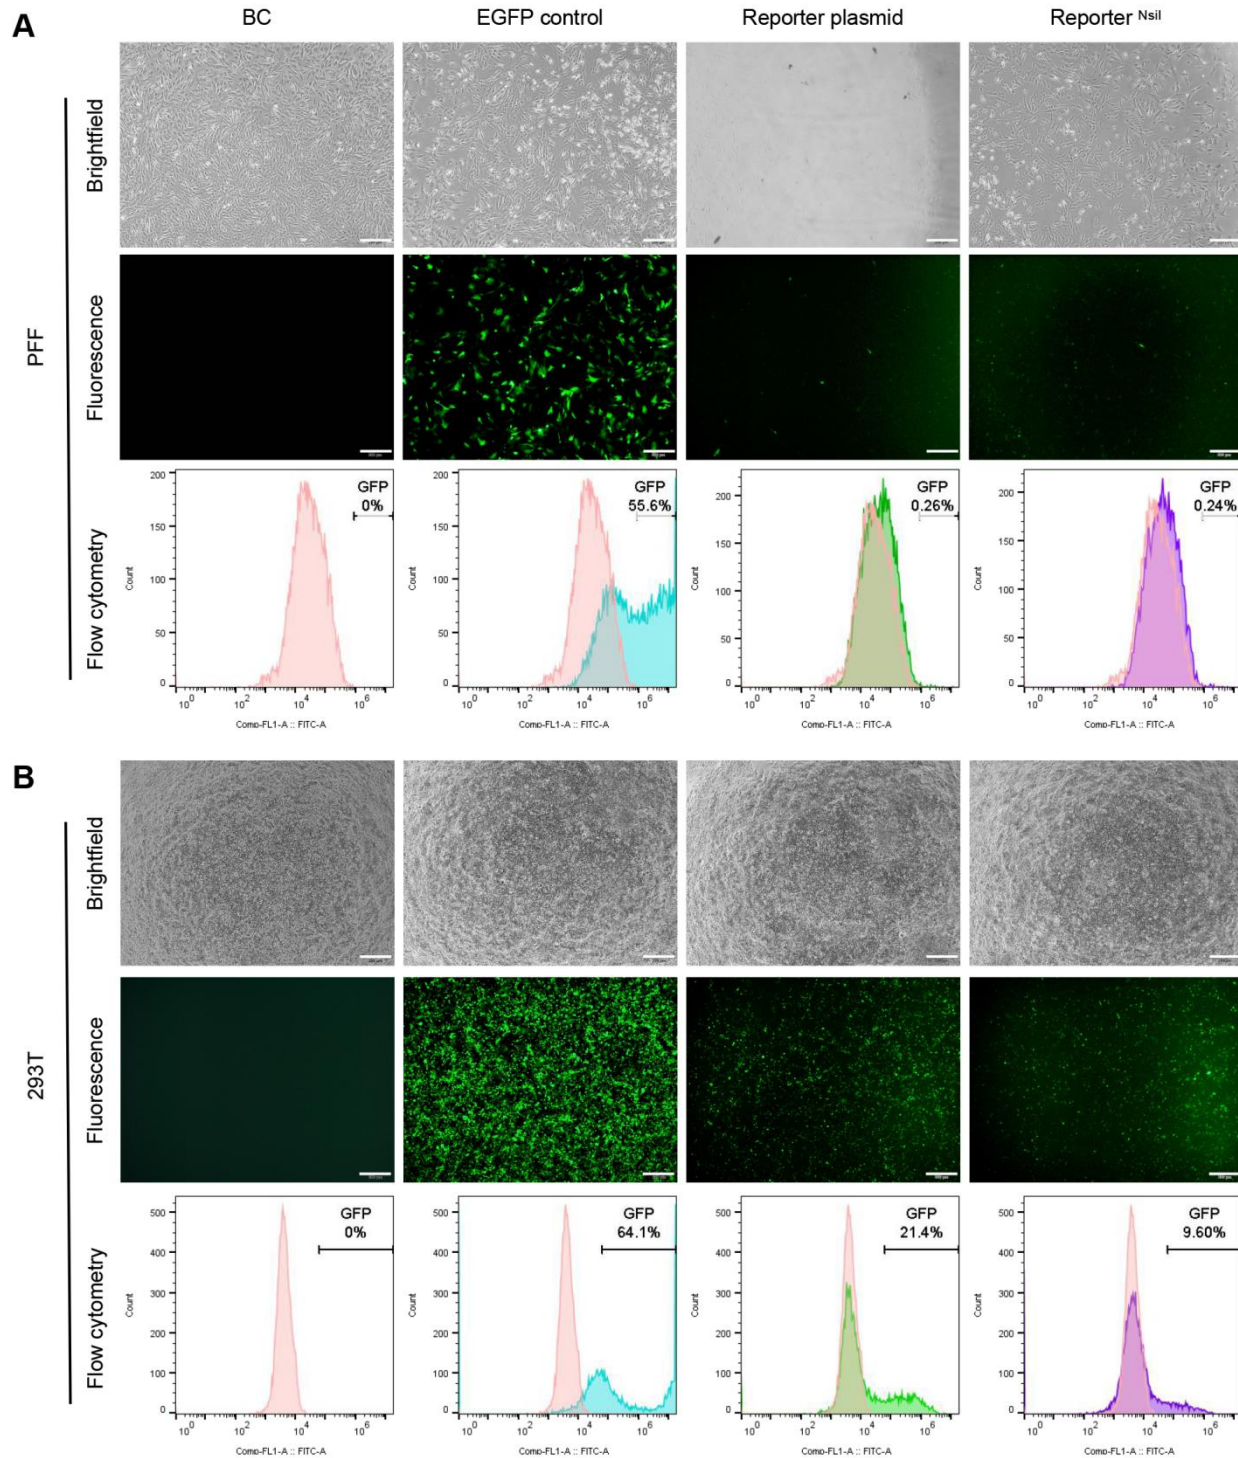

**Figure S5.** Non-Porcine cells were transfected with different forms of porcine HDR reporter. (A) PFF cells and (B) 293T cells were transfected with different forms of reporter. Blank control: no treatment. EGFP control: transfected with EGFP-N2 plasmid as positive control. Reporter plasmid: reporter donor only. Reporter<sup>NsiI</sup>: reporter was digested with NsiI. EGFP fluorescence were detected using fluorescence microscopy and measured by flowcytometry at 2 days post transfection. Scale bar: 200  $\mu$ m.

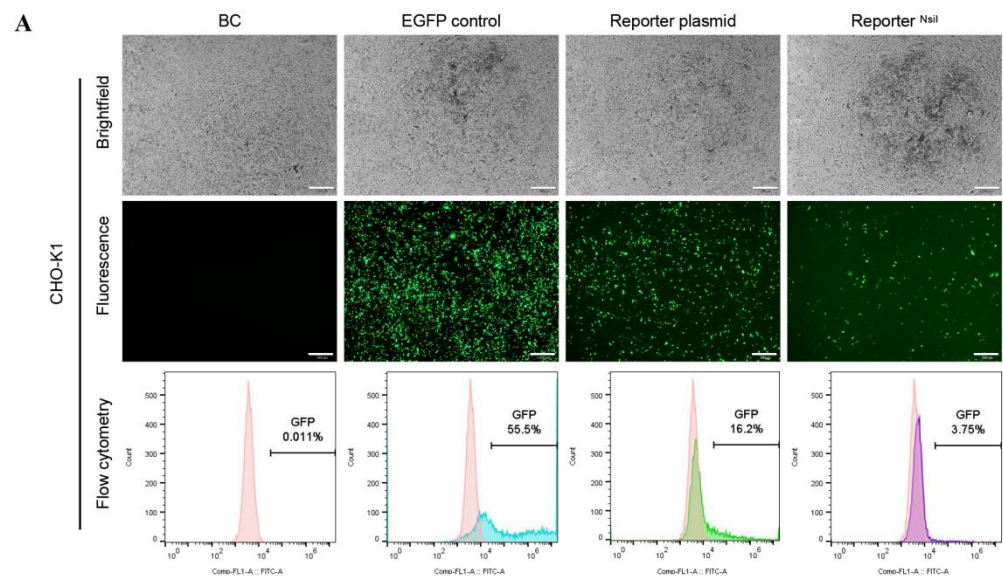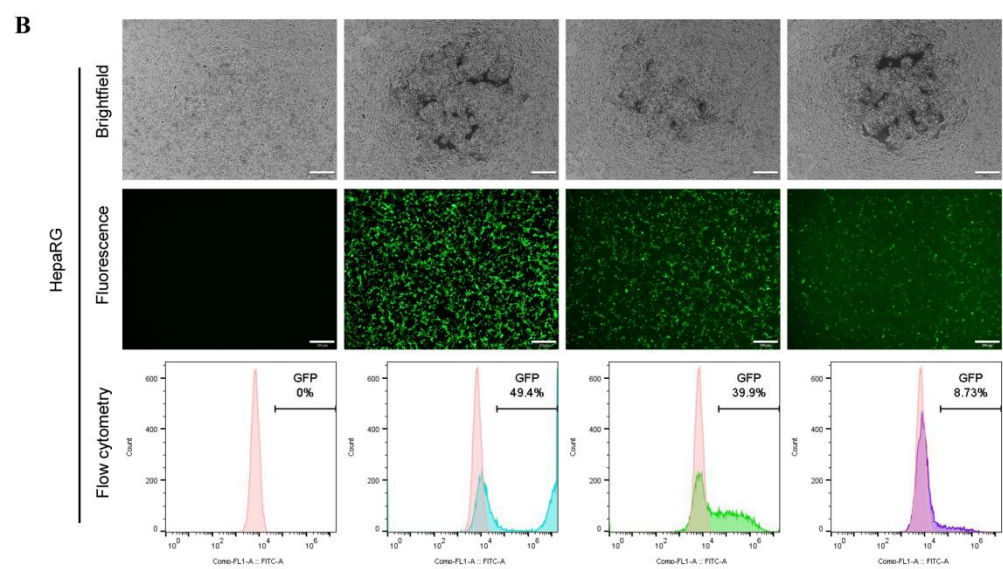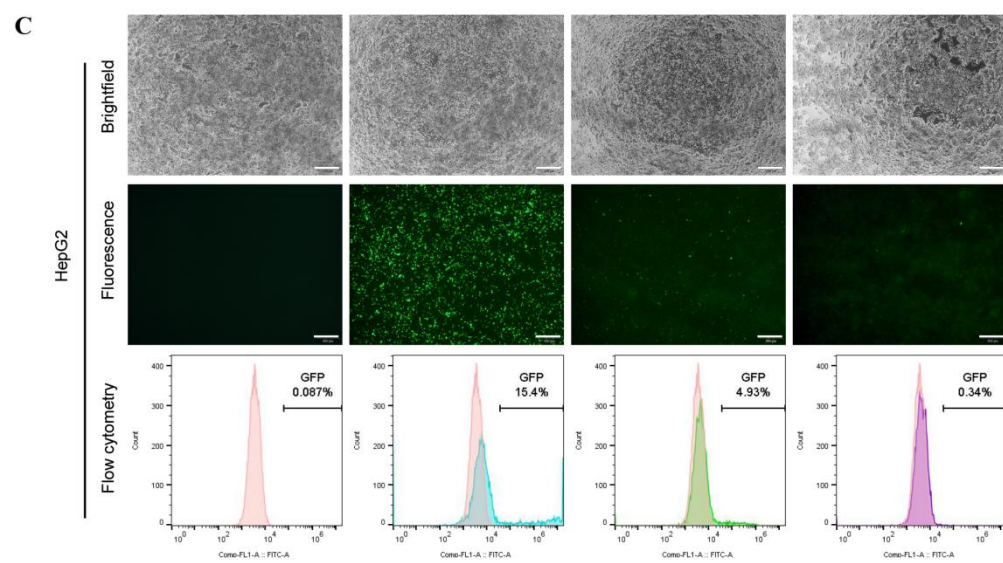

**Figure S6.** Non-Porcine cells were transfected with different forms of porcine HDR reporter. **(A)** CHO-K1 cells **(B)** HepaRG cells and **(C)** HepG2 cells were transfected with different forms of reporter. Blank control: no treatment. EGFP control: transfected with EGFP-N2 plasmid as positive control. Reporter plasmid: reporter donor only. Reporter<sup>NsiI</sup>: reporter was digested with NsiI. EGFP fluorescence were detected using fluorescence microscopy and measured by flowcytometry at 2 days post transfection. Scale bar: 200  $\mu$ m

### Supplementary Tables

**Table S1:** A summary of promoterless reporters targeting endogenous locus for evaluating the CRISPR/Cas9-mediated HDR efficiency



| Promoterless Reporter                                                                                                                                                                                        | Conclusion                                                                                                                                                                                                                                                                                                                                                                                                                                                                         | Reference                                        |
|--------------------------------------------------------------------------------------------------------------------------------------------------------------------------------------------------------------|------------------------------------------------------------------------------------------------------------------------------------------------------------------------------------------------------------------------------------------------------------------------------------------------------------------------------------------------------------------------------------------------------------------------------------------------------------------------------------|--------------------------------------------------|
| <p>Reporter contains internal ribosomal entry site, EGFP sequence with 50-base-pair left and right homology arms (HA).</p>  | <p>Adding 5' C6-PEG10 modifications to this promoterless reporter led to up to a five-fold increase in gene knock-in rates at various genomic loci in human cancer and stem cells. For GAPDH locus, the KI rate after applying 5' C6-PEG10 modifications reporter with short HA (50 bp) was increased from <math>35.7 \pm 2.5\%</math> to <math>59.4 \pm 0.50\%</math> in HEK293T.</p>                                                                                             | <p>Yu, et al. Nat Chem Biol. 2020</p>            |
| <p>Reporter contains a 200-bp left homology arm, 800-bp right TF-binding motifs left homology arm and a T2A-EGFP tag</p>    | <p>Constructed a fusion protein between Cas9 and TF DNA-binding domain and appended the TF-recognized DNA sequence to the ends of reporter to co-localize the two components in DNA repair process. Based on this strategy, HDR efficiency increase by 2 to 6 fold at various genome sites in human cells. The HDR efficiency at GAPDH in HEK293T was increased from 9.16% to 16.58%. Adding small-molecule HDR enhancer further increase HDR efficiency to approximately 40%.</p> | <p>Li, et al. J Biol Chem. 2021</p>              |
| <p>Reporter contains 800 bp left and right homologous arms and a P2A-EGFP gene</p>                                          | <p>When SHROOM1 siRNA were applied, HDR efficiency increase from <math>(2.19\% \pm 0.23\%)</math> to <math>(6.66\% \pm 0.31\%)</math> utilizing a double strand PCR reporter at FBL locus in HEK293T.</p>                                                                                                                                                                                                                                                                          | <p>Zhao, et al. Int J Mol Sci. 2020</p>          |
| <p>Reporter contains splice acceptor sequences and EGFP gene with different lengths HA (500bp-1500bp).</p>                 | <p>Reporters with different HA lengths resulted in 4.21%-10.61% KI efficiency at ROSA26 in porcine foetal fibroblasts. Synchronization with Nocodazole treatment further resulted in a 2.8-fold increase in HDR efficiency (29.6%).</p>                                                                                                                                                                                                                                            | <p>Xie, et al. Sci Rep. 2017</p>                 |
| <p>Reporter carry a promoterless gene trap cassette with an H2B-EGFP cDNA flanked by homology arms</p>                    | <p>Compared with sgRNA with the Cas9 protein, CRISPR RNA (crRNA)-trans-activating crRNA (tracrRNA)-Cas9 protein complexes led to a 10 fold increase in HDR efficiency at ROSA26 locus in mouse zygotes.</p>                                                                                                                                                                                                                                                                        | <p>Abe, et al. Cell Rep. 2020</p>                |
| <p>Reporter contains homologous arms and a T2A-EGFP sequence</p>                                                          | <p>Chromatin reporter led to 2.3-to-7.4 fold HDR increase compared with naked DNA reporter at the tested endogenous loci in human cells (MCF10A, HeLa). HDR efficiency increase from 2.6% to 6% at GAPDH locus in HeLa cells.</p>                                                                                                                                                                                                                                                  | <p>Cruz-Becerra, et al. Elife. 2020</p>          |
| <p>Reporter contains EGFP sequence with short homology arms (0-30bp)</p>                                                  | <p>HDR efficiency increase from 0% to 15% when reporters had 0-30 bp HAs targeting Lamin A/C or RAB11 locus in HEK293T cells.</p>                                                                                                                                                                                                                                                                                                                                                  | <p>Paix, et al. Proc Natl Acad Sci USA. 2017</p> |
| <p>Reporters contains P2A-mKate sequences with different length of homologous arm (10-300bp)</p>                          | <p>dCas9-SSAP editor (couple microbial single-strand annealing proteins (SSAPs) with catalytically inactive dCas9) has low on-target errors and minimal off-target effects, showing higher accuracy than canonical Cas9 methods. Reporters with different HA lengths resulted in 2%-5% KI efficiency at DYSLT1 locus in HEK293T cells.</p>                                                                                                                                         | <p>Wang, et al. Nat Cell Biol. 2022</p>          |
| <p>Reporters contains T2A-EGFP sequences with different length of homologous arm (50-1800bp)</p>                          | <p>Co-transfection of the HDR-USR(universal surrogate reporter) system into host cells and transient puromycin selection efficiently achieves enrichment of HDR-modified cells. 2.3-to-7.4 fold enrich with reporter using 50 bp-to-1800 bp homologous arms at GAPDH in HEK293T cells (HDR efficiency increase from 1.42% to 9.6%).</p>                                                                                                                                            | <p>Yan, et al. Mol Ther Nucleic Acids. 2020</p>  |

**Table S2:** Targeting sequences of CRISPR/Cas9 and oligonucleotides for cloning into sgRNA-expressing vectors

| Target gene                           | Target sequence with PAM        | sgRNA name | Forward oligonucleotides for cloning | Reverse oligonucleotides for cloning | Vector           | Restriction enzyme |
|---------------------------------------|---------------------------------|------------|--------------------------------------|--------------------------------------|------------------|--------------------|
| <i>GAPDH</i><br>( <i>Sus scrofa</i> ) | CCTCCTCGCGTGCTCTTGCT <u>GGG</u> | sgRNA1     | caccCCTCCTCGCGTGCTCTTGCT             | aaacAGCAAGAGCACGC GAGGAGG            | pU6-sgRNA-vector | BbsI               |
| <i>GAPDH</i><br>( <i>Sus scrofa</i> ) | GTGTGTTGGGGGATCGAGTT <u>GGG</u> | sgRNA2     | caccGTGTGTTGGGGGATCGAGTT             | aaacAACTCGATCCCC AACACAC             | pU6-sgRNA-vector | BbsI               |
| <i>GAPDH</i><br>( <i>Sus scrofa</i> ) | CATGGTCCACATGGCCTCCA <u>AGG</u> | sgRNA3     | caccCATGGTCCACATGGCCTCCA             | aaacTGGAGGCCATGTG GACCATG            | pU6-sgRNA-vector | BbsI               |

**Table S3:** pU6-sgRNA plasmids made for the study

| No. | Name                         | Purpose                                                               | Generation strategy                                                                                                                                                                                                                          |
|-----|------------------------------|-----------------------------------------------------------------------|----------------------------------------------------------------------------------------------------------------------------------------------------------------------------------------------------------------------------------------------|
| 1   | pU6-sgRNA1 expression vector | Plasmid expressing single guide RNA targeting <i>Sus scrofa GAPDH</i> | The annealed product of oligonucleotides (sgRNA1, 5'-caccCCTCCTCGCGTGCTCTTGCT-3' and 5'-aaacAGCAAGAGCACGC GAGGAGG-3') were annealed to form double-strand DNA and then cloned into BbsI restriction enzyme-digested U6-sgRNA cloning vector. |
| 2   | pU6-sgRNA2 expression vector | Plasmid expressing single guide RNA targeting <i>Sus scrofa GAPDH</i> | The annealed product of oligonucleotides (sgRNA2, 5'-caccGTGTGTTGGGGGATCGAGTT-3' and 5'-aaacAACTCGATCCCCAACACAC-3') were annealed to form double-strand DNA and then cloned into BbsI restriction enzyme-digested U6-sgRNA cloning vector.   |
| 3   | pU6-sgRNA3 expression vector | Plasmid expressing single guide RNA targeting <i>Sus scrofa GAPDH</i> | The annealed product of oligonucleotides (sgRNA3, 5'-caccCATGGTCCACATGGCCTCCA-3' and 5'-aaacTGGAGGCCATGTGGACCATG-3') were annealed to form double-strand DNA and then cloned into BbsI restriction enzyme-digested U6-sgRNA cloning vector.  |
